# Parasitic Worms: Knowledge, Attitudes, and Practices in Western Côte d'Ivoire with Implications for Integrated Control

Cynthia A. Acka<sup>1,2</sup>, Giovanna Raso<sup>2,3,4</sup>, Eliézer K. N'Goran<sup>2,5</sup>, Andres B. Tschannen<sup>2</sup>, Isaac I. Bogoch<sup>6</sup>, Essane Séraphin<sup>1</sup>, Marcel Tanner<sup>3,4</sup>, Brigit Obrist<sup>3,4,7</sup>, Jürg Utzinger<sup>3,4\*</sup>

**1** Unité de Formation et de Recherche (UFR) Sciences Sociales, Université de Cocody-Abidjan, Abidjan, Côte d'Ivoire, **2** Département Environnement et Santé, Centre Suisse de Recherches Scientifiques en Côte d'Ivoire, Abidjan, Côte d'Ivoire, **3** Department of Epidemiology and Public Health, Swiss Tropical and Public Health Institute, Basel, Switzerland, **4** University of Basel, Basel, Switzerland, **5** Unité de Formation et de Recherche (UFR) Biosciences, Université de Cocody-Abidjan, Abidjan, Côte d'Ivoire, **6** Division of Infectious Diseases, Massachusetts General Hospital, Boston, Massachusetts, United States of America, **7** Institute of Social Anthropology, University of Basel, Basel, Switzerland

## Abstract

**Background:** In the developing world where parasitic worm infections are pervasive, preventive chemotherapy is the key strategy for morbidity control. However, local knowledge, attitudes, and practices (KAP) of parasitic worms are poorly understood, although such information is required for prevention and sustainable control.

**Methods:** We carried out KAP surveys in two rural communities of Côte d'Ivoire that were subjected to school-based and community-based research and control activities. We used qualitative and quantitative methods. The former included observations, in-depth interviews with key informants, and focus group discussions with school children and adults. Quantitative methods consisted of a structured questionnaire administered to household heads.

**Principal Findings:** Access to clean water was lacking in both communities and only a quarter of the households had functioning latrines. There was a better understanding of soil-transmitted helminthiasis than intestinal schistosomiasis, but community-based rather than school-based interventions appeared to improve knowledge of schistosomiasis. In the villages with community-based interventions, three-quarters of household interviewees knew about intestinal schistosomiasis compared to 14% in the village where school-based interventions were implemented ( $P < 0.001$ ). Whereas two-thirds of respondents from the community-based intervention village indicated that the research and control project was the main source of information, only a quarter of the respondents cited the project as the main source.

**Conclusions/Significance:** Preventive chemotherapy targeting school-aged children has limitations, as older population segments are neglected, and hence lack knowledge about how to prevent and control parasitic worm infections. Improved access to clean water and sanitation is necessary, along with health education to make a durable impact against helminth infections.

**Citation:** Acka CA, Raso G, N'Goran EK, Tschannen AB, Bogoch II, et al. (2010) Parasitic Worms: Knowledge, Attitudes, and Practices in Western Côte d'Ivoire with Implications for Integrated Control. *PLoS Negl Trop Dis* 4(12): e910. doi:10.1371/journal.pntd.0000910

**Editor:** David Joseph Diemert, The George Washington University Medical Center, United States of America

**Received:** April 20, 2010; **Accepted:** November 10, 2010; **Published:** December 21, 2010

**Copyright:** © 2010 Acka et al. This is an open-access article distributed under the terms of the Creative Commons Attribution License, which permits unrestricted use, distribution, and reproduction in any medium, provided the original author and source are credited.

**Funding:** This study was supported by the Centre Suisse de Recherches Scientifiques en Côte d'Ivoire (CSRS) and received financial support from the Swiss Agency for Development and Cooperation (SDC), through the project "Contribution du CSRS au processus de reconciliation en Côte d'Ivoire" in the frame of the "Programme d'appui de la SDC a la reconciliation en Côte d'Ivoire". C.A. Acka is grateful to the Swiss Federal Commission for Fellowships for Foreign Student (CFBEE) for financing a several-months stay at the Swiss Tropical and Public Health Institute for analysis and writing up the current manuscript. G. Raso (project no. PBB5B-109011) and J. Utzinger (project no. PPOOB-102883, PPOOB-119129) are grateful to the Swiss National Science Foundation for financial support. J. Utzinger also acknowledges support from the European Union (FP6 STREP CONTRAST project, contract no. 032203). The funders had no role in study design, data collection and analysis, decision to publish, or preparation of the manuscript.

**Competing Interests:** The authors have declared that no competing interests exist.

\* E-mail: juerg.utzinger@unibas.ch

## Introduction

Parasitic worms (helminths), such as soil-transmitted helminths and schistosomes, were so common in the 1940s that Norman W. Stoll coined the term "this wormy world" [1]. Helminths continue to affect hundreds of millions of people today. Indeed, more than half of the human population is at risk of soil-transmitted helminthiasis and schistosomiasis with more than 1 billion people infected, possibly causing a global burden of more than 40 million

disability-adjusted life years (DALYs) lost annually [2–7]. Improvements have been made to reduce helminth transmission in many parts of the world [8], but worm infections continue to be an issue of major public health and socio-economic concern. Helminthic diseases disproportionately affect those in poverty [9,10], with the poorest of the poor commonly suffering from multiple species infections concurrently [11–13].

In 2001 a resolution was passed during the 54<sup>th</sup> World Health Assembly (WHA) with the target (for member states) to regularly

## Author Summary

There is a need to better understand communities' knowledge, attitudes, and practices (KAP) of neglected tropical diseases to improve prevention and control efforts. We studied the socio-cultural aspects of parasitic worm infections in two villages (Mélapleu and Zouatta II) of western Côte d'Ivoire, where research and control activities have been implemented. Zouatta II was exposed to a community-based approach, while school-based interventions were implemented in Mélapleu. KAP surveys were carried out using qualitative and quantitative methods. Although there was some knowledge of parasitic worm infections in both villages, we found important differences between the two villages regarding intestinal schistosomiasis: there was a better understanding of this disease in Zouatta II. However, even the community-based research and control efforts implemented in Zouatta II were ineffective in transforming the information conveyed into preventive behavior related to water contact. Our results suggest that KAP of parasitic worm infections conveyed by research and control activities targeting only school-aged children have shortcomings as older population groups are left out. Hence, for effective control of parasitic worms, children and adults must be educated and interventions should include access to deworming drugs, clean water and sanitation.

administer anthelmintic drugs to at least 75% and up to 100% of all school-aged children at risk of morbidity due to schistosomiasis and soil-transmitted helminthiasis by 2010 [14]. In the same year, the World Health Organization (WHO) assembled an expert committee to refine the global strategy for the prevention and control of schistosomiasis and soil-transmitted helminthiasis. Since then, millions of school-aged children have received anthelmintic drugs (albendazole or mebendazole against soil-transmitted helminthiasis and praziquantel against schistosomiasis) [15–17]. Comparatively little emphasis has been put on improving access to clean water and adequate sanitation and changing hygiene behavior, although these interventions represent an effective way for preventing intestinal parasitic infections, and are key factors for sustainable control [17–20].

Health education and promotion campaigns are essential for any change in behavior to be made. For health education and promotion activities to be effective, target audiences must be identified so that a clear message can be delivered, and hence local knowledge and perceptions must be taken into account [21]. Recent studies support that both individual and community perceptions and attitudes of parasitic worm infections and their prevention and treatment are important factors [22–24].

Over the past 15 years, we carried out research and control activities against schistosomiasis, soil-transmitted helminthiasis, and malaria in the region of Man in western Côte d'Ivoire, including studies which assessed local perceptions toward parasitic worm infection, drug intervention studies, risk mapping and prediction, and community-based control activities [25–32]. Here we describe knowledge, attitudes, practices (KAP) and behavior related to helminth infections in two rural communities of western Côte d'Ivoire that were subjected to either school-based or community-based research and control activities. The experience gained from this study might be useful for the design and implementation of an integrated control program and the lessons learned might stimulate other control programs to think and act beyond preventive chemotherapy.

## Methods

### Study area and historical context

The Man region in western Côte d'Ivoire is populated by four main ethnic groups: Guéré, Toura, Wobé, and Yacouba. This study was conducted in the villages of Mélapleu (primarily Yacouba) and Zouatta II (primarily Wobé) between October 2003 and June 2004. Details of the study villages, with particular emphasis on intestinal helminth infections, have been described elsewhere [11,25,33]. At the time of the survey there were no health facilities available in either village. The health center nearest to Mélapleu was situated in the neighboring village of Gbatongouin, some 5 km east. With regard to Zouatta II, the nearest health center was located in Facobly, approximately 10 km away. In the district town of Man, some 25 km away from each village, there is a hospital. Of note, due to an armed conflict and socio-political unrest that occurred in Côte d'Ivoire since September 2002 [30], only the hospital of Man was functional at the time of the study and was run by the non-governmental organization 'Médecins sans Frontiers', providing free medical care for those in need. Apart from the research activities undertaken by the Centre Suisse de Recherches Scientifiques en Côte d'Ivoire (CSRS), in partnership with the Université de Cocody-Abidjan and the Swiss Tropical and Public Health Institute (Swiss TPH), only very limited actions against schistosomiasis, soil-transmitted helminthiasis and malaria had taken place in this area.

A pilot study was carried out in Mélapleu and two neighboring villages in 1996 to develop a questionnaire for the rapid identification of school children at risk of intestinal schistosomiasis [25]. Self-reported blood in stool proved a promising symptom, and hence the questionnaire was administered at the regional level, first in 1997 and again in 2002. Questionnaire results were validated with parasitological results obtained from 57–60 randomly selected schools using Kato-Katz thick smear examinations of stool samples from up to 100 children per school [26,28]. The parasitological data were subsequently used for mapping and predicting the distribution of *Schistosoma mansoni*, hookworm, and *S. mansoni*-hookworm co-infections [29,34–37]. In addition, a study was carried out in school children to assess the day-to-day and intra-specimen variation of *S. mansoni* egg output before and after praziquantel administration [34].

In Zouatta II, a multidisciplinary community-based study was implemented in 2002, consisting of a KAP survey pertaining to hygienic habits, water-contact and health-seeking behavior and in-depth appraisal of *S. mansoni*, soil-transmitted helminths, intestinal protozoa, and *Plasmodium* infections and multiparasitism among all family members living in 75 randomly selected households (more than half of the village) [11,33,38]. Infected individuals were treated and awareness was raised about how to prevent parasitic worm infections in the future with a small, local public health campaign at the time of the study.

To better understand the perception and practices of parasitic worms, we used a combination of qualitative and quantitative methods. Data were then triangulated to verify and complete information gathered from communities. While the quantitative approach permitted us to obtain information on the frequency of people reporting signs and symptoms, causes, treatment and prevention of helminth diseases, the qualitative data allowed us to further deepen the meaning of the diseases and to assess actual practice.

### Qualitative methods

For the current study, a two-step qualitative approach was adopted. First, observations were made over a 2-week period at

community places such as churches, local markets, schools, and water collection and washing sites. This enabled us to identify potential key informants and water contact sites for the second phase of the study. In addition, we observed and collected information on means of communication between formal and informal groups – such as youth, women, congregations, community assistance groups, and community leaders (e.g. meetings within and between groups, radio, and television). Finally, 30 focus group discussions (FGDs) and five semi-structured interviews were conducted.

The FGDs (20 in Zouatta II, 10 in Mélapleu) were conducted with elderly women, adult women, adult men and school children. Common diseases, knowledge of signs and symptoms, causes, treatment, and prevention of schistosomiasis and intestinal helminths, as well as water use and sanitation practices were discussed. The semi-structured interviews were conducted with traditional healers (three in Zouatta II, two in Mélapleu). The roles of traditional healers in the community and common diseases they deal with were discussed. The traditional healers' knowledge of intestinal helminth infections and schistosomiasis was also explored. FGDs and interviews were tape-recorded and transcribed. The information was used to create a detailed reconstruction of villagers' KAP pertaining to intestinal schistosomiasis and soil-transmitted helminthiasis.

### Quantitative methods

Quantitative techniques consisted of household surveys that utilized a structured questionnaire with both closed and open-ended questions. Closed questions pertained to demographic and socio-economic factors, knowledge of local terms for schistosomiasis, and measures for preventing parasitic worm infection. Other aspects of knowledge and practices were explored by open-ended questions.

A complete list of households in each village was obtained by census and all households were enrolled. Only household heads were interviewed; if a household head was absent, an adult household member was interviewed instead. Questionnaires were administered in the local language by trained enumerators. The survey collected demographic data and assessed interviewee's knowledge and practices of parasitic worms. Because there is no local translation for intestinal schistosomiasis, we inquired about related symptoms, such as blood in stool and abdominal pain [25,39]. Respondents were asked whether they consider intestinal worms and schistosomiasis harmful, how an individual becomes infected, type of treatment sought, how to avoid worm infections, and the source of information.

### Socio-economic status

A household-based asset approach was used to estimate the socio-economic status of each household, including principal component analysis [40]. The first principal component (PC) of asset ownership across households explained 20% of the variability and gave greatest weight to households possessing a radio (0.47), followed by a ventilator (0.42), and a television (0.42). After standardization of these weighted asset variables, households possessing a ventilator had the greatest score (1.57), followed by households with a refrigerator (1.53). The lowest scores were associated to households that lacked a bicycle (−0.47) or a radio (−0.38). The asset scores were summed to a total score attached to each household, and households were ranked according to their total score. Thereafter, households were grouped into wealth quintiles: most poor, very poor, poor, less poor, and least poor [28,41].

### Data management and analysis

Qualitative data analysis was based on the model of systems of signs, meaning, and action [42]. It aims to identify the system of signs, meaning, and actions that contribute to individuals' perceptions, interpretations, and behavior of health. A preliminary analysis was performed on the public perception of helminth infection and then created a "code list". This code list documents information categories, types, and contents related to public perceptions of a helminth infection. With the help of this code list, interviews and FGDs were broken down into multiple units. Coded interviews and FGDs were then entered into a Maxqda database (VERBI Software Consult, Social Research, GmbH; Berlin, Germany). The coded data were analyzed for the frequency at which information and content categories occur, including correlations between these variables. The software also allows for the rapid retrieval of text related to one or more information categories and the identification of informants. After coding, the first level of analysis was conducted to identify different types of symptoms, perceived causes, preventative strategies, and treatment options that were outlined by respondents. Water contact behavior and sources of information were identified in the frame of the first level of analysis. The second level of analysis examined the contents of several categories of information by investigating the implied meaning associated with each category. The analysis was also conducted on the articulations and discontinuities among the system of signs, meaning, and actions.

Quantitative data were entered into EpiInfo version 6.04 (Center for Disease Control and Prevention; Atlanta, GA, USA). Analyses were performed with STATA version 8.0 (Stata Corporation; College Station, TX, USA). A chi-square ( $\chi^2$ ) test was used to determine inter-village differences.  $\chi^2$  and Fisher's exact tests were used to assess the association between KAP, demographic factors, and socio-economic variables.

### Ethical statement

The study protocol was approved by the institutional research commissions of the CSRS in Abidjan, Côte d'Ivoire and the Swiss TPH in Basel, Switzerland. The study was cleared by the Ministry of Higher Education and Research of Côte d'Ivoire, and the district health and education authorities of Man. The village chiefs in Zouatta II and Mélapleu were asked for permission to work in the village, and then a meeting was organized with the village authorities to explain the aims and procedures of the study. The purpose and activities of the study were explained to the local community including parents and teachers. Sufficient time was given to ask question and it was emphasized that participation was voluntary. Oral consent was obtained, since the majority of the participants were illiterate. A local witness was present during oral consent. Hence, we followed common procedures for studies carried out in Côte d'Ivoire when only questionnaire data are collected and no concurrent biological samples.

## Results

### Characteristics of the study population

A total of 207 interviews were conducted with household heads; 111 (53.6%) in Mélapleu and 96 (46.4%) in Zouatta II. Table 1 shows the respondents' characteristics. The two communities showed no difference with regard to age, sex, education, and occupation. However, there was a significant difference in religion; the majority of interviewees in Mélapleu were animists, whereas Christians were predominant in Zouatta II. Moreover, marital status differed significantly between the two villages with a higher

**Table 1.** Characteristics of the study populations in western Côte d'Ivoire, subjected to KAP surveys for parasitic worms in 2003/2004.

| Characteristics                   | Total<br>(n = 207) <sup>a</sup> | Village                               |                                      | $\chi^2$ | P-value             |
|-----------------------------------|---------------------------------|---------------------------------------|--------------------------------------|----------|---------------------|
|                                   |                                 | Zouatta II<br>(n = 96) <sup>a,b</sup> | Mélapleu<br>(n = 111) <sup>a,c</sup> |          |                     |
| Sex                               |                                 |                                       |                                      |          |                     |
| Male                              | 57                              | 58                                    | 55                                   |          |                     |
| Female                            | 44                              | 42                                    | 45                                   | 0.23     | 0.625               |
| Age group (years)                 |                                 |                                       |                                      |          |                     |
| 18–35                             | 34                              | 29                                    | 38                                   |          |                     |
| 36–60                             | 44                              | 49                                    | 39                                   |          |                     |
| >60                               | 23                              | 22                                    | 55                                   | 2.43     | 0.296               |
| Ethnicity                         |                                 |                                       |                                      |          |                     |
| Yacouba                           | 53                              | 3.1                                   | 96                                   |          |                     |
| Wobé                              | 40                              | 87                                    | 0                                    |          |                     |
| Others                            | 7.2                             | 10                                    | 4.5                                  | N/A      | <0.001 <sup>d</sup> |
| Religion                          |                                 |                                       |                                      |          |                     |
| Animists                          | 50                              | 28                                    | 69                                   |          |                     |
| Christians                        | 32                              | 56                                    | 11                                   |          |                     |
| Moslems                           | 13                              | 13                                    | 14                                   |          |                     |
| Atheists                          | 4.8                             | 3.1                                   | 6.3                                  | N/A      | <0.001 <sup>d</sup> |
| Education                         |                                 |                                       |                                      |          |                     |
| Illiterate                        | 53                              | 54                                    | 52                                   |          |                     |
| Primary school level              | 31                              | 29                                    | 33                                   |          |                     |
| Secondary school level or higher  | 16                              | 17                                    | 14                                   | 0.48     | 0.783               |
| Matrimonial status                |                                 |                                       |                                      |          |                     |
| Married                           | 76                              | 73                                    | 79                                   |          |                     |
| Single                            | 6.8                             | 13                                    | 1.8                                  |          |                     |
| Divorced                          | 2.9                             | 5.2                                   | 0.9                                  |          |                     |
| Widower                           | 14                              | 9.4                                   | 18                                   | 15.0     | 0.002               |
| Occupation                        |                                 |                                       |                                      |          |                     |
| Farmer                            | 92                              | 93                                    | 91                                   |          |                     |
| Fisherman                         | 3.4                             | 4.2                                   | 2.7                                  |          |                     |
| Trader                            | 2.9                             | 1.0                                   | 4.5                                  |          |                     |
| Teacher                           | 0.5                             | 1.0                                   | 0                                    |          |                     |
| None                              | 0.5                             | 0                                     | 0.9                                  |          |                     |
| Others                            | 1.0                             | 1.0                                   | 0.9                                  | N/A      | 0.479 <sup>d</sup>  |
| Household assets                  |                                 |                                       |                                      |          |                     |
| Electricity                       | 68                              | 51                                    | 82                                   | 22.5     | <0.001              |
| Latrine                           | 25                              | 29                                    | 22                                   | 1.55     | 0.212               |
| Well                              | 15                              | 27                                    | 5                                    | 20.6     | <0.001              |
| Radio                             | 47                              | 46                                    | 49                                   | 0.16     | 0.686               |
| Television                        | 21                              | 13                                    | 29                                   | 8.20     | 0.004               |
| Video                             | 1.4                             | 0                                     | 2.7                                  | N/A      | 0.105 <sup>d</sup>  |
| Ventilator                        | 6.8                             | 6.3                                   | 7.2                                  | 0.07     | 0.784               |
| Refrigerator                      | 3.9                             | 3.1                                   | 4.5                                  | 0.26     | 0.608               |
| Bicycle                           | 3.9                             | 5.2                                   | 2.7                                  | N/A      | 0.351 <sup>d</sup>  |
| Land possession (m <sup>2</sup> ) |                                 |                                       |                                      |          |                     |
| <2000                             | 44                              | 55                                    | 37                                   |          |                     |
| ≥2000                             | 40                              | 15                                    | 56                                   | 47.36    | <0.001              |

**Table 1. Cont.**

N/A, not applicable.

<sup>a</sup>All values are percentages.<sup>b</sup>Village subjected to community-based research and control activities.<sup>c</sup>Village subjected to school-based research and control activities.<sup>d</sup>P-value based on Fisher's exact test.

doi:10.1371/journal.pntd.0000910.t001

proportion of married or widowed household heads in Mélapleu than in Zouatta II.

### Commonly perceived diseases

The most commonly perceived disease in both villages was malaria (87%). Intestinal worms, dysentery, schistosomiasis, and scabies were reported by 52%, 50%, 29% and 22%, respectively. Schistosomiasis was perceived as a common disease by 57% respondents in Zouatta II, but only 5% reported schistosomiasis in Mélapleu ( $\chi^2 = 69.7$ , degree of freedom (d.f.) = 3,  $P < 0.001$ ). Investigators explained the term “bilharziose” (schistosomiasis in French), and by describing symptoms of the disease, as there is no local name.

The most frequently mentioned signs and symptoms in both villages were cough (74%), headache (73%), fatigue (73%), abdominal pain (72%), fever (72%), backache (71%), and diarrhea (59%).

### Perception, treatment, and prevention of intestinal worms

Local names of intestinal worms were *sion mlein* and *mlein mlein* in Wobé, and *gbihienein* in Yacouba. All household heads considered intestinal worms to be a serious disease as revealed by quantitative questionnaire results. Common beliefs were that intestinal worms cause fatigue, liver damage, anemia, and other illnesses. Signs and symptoms of intestinal worm infections (i.e., loss of appetite, worms in stool, diarrhea, and blood in stool) were more often listed by respondents in Zouatta II than in Mélapleu (Table 2). A quarter of respondents in both villages reported that at least one of their children was currently affected with, or has suffered from, intestinal worm infections in the past 6 months.

The semi-structured interviews and FGDs revealed that participants in both villages were familiar with intestinal helminths and that they possess knowledge about the associated illness. *Sion mlein* and *gbihienein* were perceived to have two categories of symptoms. One category includes skin alterations such as itching, swelling, and rashes. The second category includes systemic type of illnesses consisting of weight loss, abdominal bloating, loss of appetite, weakness, vomiting, and bloody stools. Each category combined different elements from the context, values, and cultural beliefs that formed the population's concept of disease severity and causality. For example, mothers knew that skin disorders were related to disease onset and, in their view, the discomfort caused by such skin disorders justified seeking medical attention, but was not an indication that the disease was serious. The common perception was that both traditional and modern medicines would stop disease progression.

The second category of symptoms was more widely perceived to be caused by worms. For example, abdominal bloating was thought to be commonly caused by worms, and the associated symptoms of fatigue, anorexia, and anemia was thought to ultimately lead to the progressive destruction of the body. Most participants considered worms as a very serious problem in children, capable of causing fatalities in the absence of early treatment.

In both villages, it was commonly believed that consumption of meat and sweetened foods were the main sources of infection. Significant differences between the two villages were noted with regard to consumption of overripe fruits (90% in Zouatta II vs. 77% in Mélapleu) and poor hygiene (69% in Zouatta II vs. 35% in Mélapleu). One-fifth of the respondents perceived intestinal worms as inborn diseases. FGDs revealed that participants did not establish a link between intestinal worm infections and contact with soil. A few women attributed worm infections in children to the habit of soil consumption as illustrated by an adult woman from Mélapleu: “*The one to two-year-old children contract worm infections from eating soil*”.

With regard to treatment, the majority of participants ranked medical treatment as the most effective approach and 84% of the household claimed to have taken anthelmintic drugs, among which 58% had taken medicine sold on local street markets and 49% traditional medicine. Medical treatment was considered to be relatively inaccessible, and hence traditional medicine and drugs from local street markets were used instead.

The importance of washing hands, washing fruits, and wearing shoes as preventive measures against intestinal worms were significantly more often reported in Zouatta II than in Mélapleu.

Despite this knowledge, most households used unprotected surface water from rivers and ponds as source of drinking water. Collection of water from wells for drinking was rare in both villages (9.5% in Zouatta II, 1.9% in Mélapleu). Functioning latrines were available in only 52 households (29% in Zouatta II, 21% in Mélapleu). However, the presence of a latrine did not guarantee its usage. The qualitative analysis revealed that open defecation (“in the bush”, in close proximity to or inside a river) was common in both communities. Young children were allowed to defecate anywhere within the compound or at the entrance of the village.

Table 3 demonstrates that there was no significant difference regarding the perceived causes of intestinal worm infection and educational attainment or religion. Interviewees who completed secondary school and Christians commonly attributed worms to a lack of food hygiene, while the illiterate individuals and animists mainly considered meat consumption as a common etiology of worm infection. There were no significant differences in the knowledge of symptoms and causes of intestinal worm infection with regard to socio-economic status (Table 4).

### Perception, treatment, and prevention of intestinal schistosomiasis

Table 5 summarizes the frequencies of symptoms, causes, treatment, and prevention of intestinal schistosomiasis among respondents, stratified by village. Less than half of the respondents (43%) claimed to have knowledge of intestinal schistosomiasis; significantly more in Zouatta II (75%) than in Mélapleu (14%). In Zouatta II, the main source of information pertaining to intestinal schistosomiasis was from health workers associated with the schistosomiasis research project (66% in Zouatta II vs. 25% in Mélapleu;  $\chi^2 = 9.4$ ,  $P = 0.002$ ). In Mélapleu, schools were cited as the most important source of information (62%), with a statistically

**Table 2.** Knowledge of, and measures against, intestinal worms in two villages of western Côte d'Ivoire in 2003/2004.

| Variable                                | Total<br>(n = 207) | Village                               |                                      | $\chi^2$ | P-value |
|-----------------------------------------|--------------------|---------------------------------------|--------------------------------------|----------|---------|
|                                         |                    | Zouatta II <sup>a,b</sup><br>(n = 96) | Mélapleu <sup>a,c</sup><br>(n = 111) |          |         |
| <b>Signs and symptoms</b>               |                    |                                       |                                      |          |         |
| Swollen stomach                         | 93                 | 95                                    | 91                                   | 1.10     | 0.293   |
| Vomiting/nausea                         | 92                 | 91                                    | 93                                   | 0.32     | 0.571   |
| Loss of weigh                           | 81                 | 80                                    | 81                                   | 0.02     | 0.874   |
| Loss of appetite                        | 74                 | 84                                    | 65                                   | 10.2     | 0.001   |
| Worms in stool                          | 71                 | 78                                    | 63                                   | 6.42     | 0.011   |
| Diarrhea                                | 55                 | 66                                    | 46                                   | 8.05     | 0.005   |
| Blood in stool                          | 40                 | 58                                    | 25                                   | 23.4     | <0.001  |
| Dysentery                               | 16                 | 21                                    | 12                                   | 3.19     | 0.074   |
| <b>Perceived causes</b>                 |                    |                                       |                                      |          |         |
| Consumption of meat                     | 85                 | 84                                    | 85                                   | <0.01    | 0.951   |
| Consumption of sweets                   | 84                 | 84                                    | 84                                   | 0.01     | 0.951   |
| Consumption of overripe fruits          | 83                 | 90                                    | 77                                   | 6.01     | 0.014   |
| Consumption of spoiled meal             | 54                 | 65                                    | 44                                   | 8.64     | 0.003   |
| Lack of hygiene                         | 51                 | 69                                    | 35                                   | 23.3     | <0.001  |
| Inborn disease                          | 20                 | 25                                    | 15                                   | 3.03     | 0.231   |
| Unknown                                 | 2.4                | 1.0                                   | 4.0                                  | 1.42     | 0.231   |
| <b>Place of treatment</b>               |                    |                                       |                                      |          |         |
| Dispensary/hospital                     | 69                 | 64                                    | 73                                   | 2.12     | 0.145   |
| Door-to-door sellers                    | 64                 | 50                                    | 76                                   | 14.7     | <0.001  |
| Hospital                                | 61                 | 86                                    | 40                                   | 47.6     | <0.001  |
| Family                                  | 50                 | 64                                    | 39                                   | 12.7     | <0.001  |
| Pharmacy                                | 38                 | 40                                    | 37                                   | 0.15     | 0.696   |
| Traditional healer                      | 23                 | 28                                    | 19                                   | 2.44     | 0.118   |
| <b>Type of treatment</b>                |                    |                                       |                                      |          |         |
| Pharmaceutical medicine                 | 84                 | 86                                    | 82                                   | 0.76     | 0.380   |
| Drugs sold on street markets            | 58                 | 69                                    | 49                                   | 8.53     | 0.003   |
| Traditional medicine                    | 49                 | 57                                    | 42                                   | 4.60     | 0.032   |
| <b>Prevention (n = 152<sup>d</sup>)</b> |                    |                                       |                                      |          |         |
| Washing hands before eating             | 81                 | 95                                    | 64                                   | 23.3     | <0.001  |
| Avoiding overripe fruits consumption    | 79                 | 89                                    | 67                                   | 10.9     | 0.001   |
| Washing hands after defecation          | 72                 | 84                                    | 59                                   | 12.4     | <0.001  |
| Avoiding meat consumption               | 71                 | 83                                    | 57                                   | 12.2     | <0.001  |
| Avoiding sweets consumption             | 70                 | 78                                    | 60                                   | 5.82     | 0.016   |
| Washing fruits before consumption       | 65                 | 83                                    | 44                                   | 24.8     | <0.001  |
| Wearing shoes                           | 55                 | 74                                    | 31                                   | 28.1     | <0.001  |

<sup>a</sup>All values are percentages.

<sup>b</sup>Village subjected to community-based research and control activities.

<sup>c</sup>Village subjected to school-based research and control activities.

<sup>d</sup>Only people who gave an affirmative response for prevention were included in this analysis.

doi:10.1371/journal.pntd.0000910.t002

highly significant difference to Zouatta II (18%;  $\chi^2 = 13.4$ ,  $P < 0.001$ ).

Blood in stool was the most common symptom associated with intestinal schistosomiasis; it was mentioned by 97% of respondents in Zouatta II. Among potential sources of infection, drinking dirty surface water was significantly more often reported in Zouatta II (93%) than in Mélapleu (56%). Additionally, bathing in dirty surface water was identified as a source of infection. Fourteen

percent of respondents from Zouatta II perceived schistosomiasis as an inborn disease.

Qualitative data showed that schistosomiasis was commonly confused with bloody diarrhea, dysentery, or hemorrhoids, particularly among women. This is supported by the following quote from a woman in Mélapleu “*We don’t know ‘bilharziouse’, we think all this is dysentery*”. We chose “blood in stool” as a variable to reconstruct experiences concerning intestinal schistosomiasis. Most



**Table 3.** Perceived causes, treatment, and prevention of intestinal worms, stratified by educational attainment and religion, in 2003/2004.

| Variable                             | Total<br>(n = 207) <sup>a</sup> | Educational attainment               |                                            |                                                            | $\chi^2$ | P-value | Religion                            |                                  |                                    |                                   | $\chi^2$ | P-value            |
|--------------------------------------|---------------------------------|--------------------------------------|--------------------------------------------|------------------------------------------------------------|----------|---------|-------------------------------------|----------------------------------|------------------------------------|-----------------------------------|----------|--------------------|
|                                      |                                 | Illiterate<br>(n = 110) <sup>a</sup> | Primary<br>school<br>(n = 65) <sup>a</sup> | Secondary<br>school and<br>higher<br>(n = 32) <sup>a</sup> |          |         | Christians<br>(n = 66) <sup>a</sup> | Moslems<br>(n = 27) <sup>a</sup> | Animists<br>(n = 104) <sup>a</sup> | Atheists<br>(n = 10) <sup>a</sup> |          |                    |
| Perceived causes                     |                                 |                                      |                                            |                                                            |          |         |                                     |                                  |                                    |                                   |          |                    |
| Consumption of meat                  | 85                              | 86                                   | 81                                         | 84                                                         | 0.72     | 0.695   | 83                                  | 78                               | 88                                 | 80                                | 1.87     | 0.599              |
| Consumption of sweets                | 84                              | 85                                   | 85                                         | 78                                                         | 1.01     | 0.602   | 85                                  | 85                               | 84                                 | 80                                | 0.19     | 0.979              |
| Consumption of overripe fruits       | 83                              | 85                                   | 82                                         | 78                                                         | 0.78     | 0.675   | 88                                  | 78                               | 81                                 | 80                                | 2.00     | 0.571              |
| Consumption of spoilt meal           | 54                              | 58                                   | 37                                         | 72                                                         | 12.5     | 0.002   | 62                                  | 44                               | 50                                 | 60                                | 3.54     | 0.315              |
| Lack of hygiene                      | 51                              | 50                                   | 45                                         | 61                                                         | 3.83     | 0.147   | 65                                  | 22                               | 50                                 | 40                                | 14.8     | 0.002              |
| Inborn disease                       | 20                              | 25                                   | 9.0                                        | 25                                                         | 6.67     | 0.036   | 24                                  | 15                               | 19                                 | 10                                | 0.66     | 0.600              |
| Type of treatment                    |                                 |                                      |                                            |                                                            |          |         |                                     |                                  |                                    |                                   |          |                    |
| Pharmaceutical medicine              | 48                              | 82                                   | 89                                         | 81                                                         | 1.89     | 0.387   | 91                                  | 78                               | 84                                 | 60                                | 7.43     | 0.059              |
| Drugs sold on street markets         | 58                              | 59                                   | 63                                         | 44                                                         | 3.40     | 0.182   | 67                                  | 56                               | 52                                 | 70                                | 4.26     | 0.234              |
| Traditional medicine                 | 49                              | 57                                   | 38                                         | 44                                                         | 6.24     | 0.044   | 55                                  | 37                               | 84                                 | 50                                | 2.35     | 0.502              |
| Prevention <sup>b</sup> (n = 152)    |                                 |                                      |                                            |                                                            |          |         |                                     |                                  |                                    |                                   |          |                    |
| Washing hands before eating          | 81                              | 82                                   | 76                                         | 88                                                         | 1.76     | 0.415   | 86                                  | 78                               | 75                                 | 100                               | 4.32     | 0.229              |
| Avoiding overripe fruits consumption | 79                              | 82                                   | 72                                         | 84                                                         | 2.31     | 0.314   | 86                                  | 67                               | 78                                 | 63                                | 4.64     | 0.200              |
| Washing hands after defecation       | 72                              | 89                                   | 63                                         | 88                                                         | 5.53     | 0.063   | 86                                  | 50                               | 67                                 | 75                                | 10.9     | 0.012              |
| Avoiding meat consumption            | 71                              | 75                                   | 69                                         | 64                                                         | 1.42     | 0.490   | 81                                  | 61                               | 68                                 | 50                                | 0.11     | 0.141              |
| Avoiding sweets consumption          | 70                              | 68                                   | 76                                         | 60                                                         | 2.15     | 0.340   | 81                                  | 72                               | 65                                 | 25                                | N/A      | 0.009 <sup>c</sup> |
| Washing fruits before consumption    | 65                              | 67                                   | 56                                         | 80                                                         | 4.74     | 0.093   | 74                                  | 50                               | 59                                 | 88                                | 6.40     | 0.094              |
| Wearing shoes                        | 55                              | 59                                   | 46                                         | 60                                                         | 2.34     | 0.310   | 75                                  | 39                               | 44                                 | 38                                | N/A      | 0.001 <sup>c</sup> |

Data from the two study villages (Mélapleu and Zouatta II) in western Côte d'Ivoire were pooled.

N/A, not applicable.

<sup>a</sup>All values are percentages.

<sup>b</sup>Only people who gave an affirmative response for prevention were included in this analysis.

<sup>c</sup>P-value based on Fisher's exact test.

doi:10.1371/journal.pntd.0000910.t003

of the participants stated that they or a relative had already experienced problems related to blood in stool at some point in the past. A young woman from Zouatta II explained: "My mother had blood in stool and abdominal pain. When she went to the hospital, the doctor said that she had 'bilharziose'". However, this symptom was referred to as dysentery, hemorrhoids, or worms rather than to intestinal schistosomiasis. Dysentery was a familiar disease process in the studied communities and regularly appeared in discussions. Still, blood in stool was seen to be a serious health problem and was believed among villagers to be caused by a parasite that is destructive to the liver and concomitantly drinks the host's blood. Many villagers sought treatment because of these perceived damaging effects. Other villagers, however, failed to seek treatment because they did not know the symptoms of intestinal schistosomiasis. In FGDs, none of the women were able to give an accurate description of the signs of the disease. Participants from Zouatta II were aware of the risks involved with direct water contacts. According to the qualitative data from the FGDs, most believed that drinking dirty water is the main route of acquiring the disease. For example, "We have no potable water here; we drink water from the well and open sources. All this gave us diseases like 'bilharziose'", said a 25-year-old woman from Zouatta II. This perception, in turn, affected people's protective measures.

Table 6 shows the causes, treatment, and prevention of intestinal schistosomiasis among the respondents, stratified by educational attainment and age. There were no significant differences between the categories with regard to perceived causes of intestinal schistosomiasis. However, a difference was noted between illiterate individuals who cited traditional medicines and drugs obtained on local markets more often than participants with at least primary schooling.

Qualitative data confirmed these findings in terms of prevention, illustrated by the following quote from a 42-year-old man from Mélapleu: "If someone knows the way of the transmission of a disease, he can avoid it. But, we don't know how we contract 'bilharziose', therefore we cannot avoid it. I know 'bilharziose' from those who went to the hospital and the doctor told them that they had this disease."

Table 7 shows the knowledge, treatment, and prevention among study participants, stratified by wealth quintiles. The poorest quintile mentioned blood in stool as the main symptom of intestinal schistosomiasis and used traditional medicine more often than the least poor. For prevention, the poorest cited avoiding drinking dirty water more often than their wealthier counterparts who, in turn, indicated more frequently to avoid bathing in dirty water. The majority of the participants mentioned that they avoided water contact as a preventive measure.

**Table 4.** Knowledge of signs and symptoms, perceived causes, treatment, and prevention of intestinal helminths, stratified by wealth quintiles, in 2003/2004.

| Variable                             | Total<br>(n = 207) <sup>a</sup> | Wealth quintile                    |                                    |                               |                                    |                                     | Ratio<br>(most poor/<br>least poor) |
|--------------------------------------|---------------------------------|------------------------------------|------------------------------------|-------------------------------|------------------------------------|-------------------------------------|-------------------------------------|
|                                      |                                 | Most poor<br>(n = 42) <sup>a</sup> | Very poor<br>(n = 42) <sup>a</sup> | Poor<br>(n = 41) <sup>a</sup> | Less poor<br>(n = 41) <sup>a</sup> | Least poor<br>(n = 41) <sup>a</sup> |                                     |
| <b>Signs and symptoms</b>            |                                 |                                    |                                    |                               |                                    |                                     |                                     |
| Swollen stomach                      | 93                              | 86                                 | 95                                 | 95                            | 95                                 | 93                                  | 0.92                                |
| Vomiting/nausea                      | 92                              | 90                                 | 95                                 | 90                            | 88                                 | 95                                  | 0.95                                |
| Loss of appetite                     | 74                              | 81                                 | 86                                 | 68                            | 68                                 | 66                                  | 1.18                                |
| Loss of weight                       | 81                              | 71                                 | 90                                 | 76                            | 83                                 | 83                                  | 0.86                                |
| Worms in stool                       | 71                              | 67                                 | 74                                 | 73                            | 73                                 | 66                                  | 1.01                                |
| Diarrhea                             | 55                              | 50                                 | 52                                 | 54                            | 59                                 | 61                                  | 0.82                                |
| Blood in stool                       | 40                              | 40                                 | 43                                 | 49                            | 27                                 | 44                                  | 0.92                                |
| Dysentery                            | 16                              | 17                                 | 17                                 | 17                            | 4.8                                | 24                                  | 0.68                                |
| <b>Perceived causes</b>              |                                 |                                    |                                    |                               |                                    |                                     |                                     |
| Consumption of meat                  | 85                              | 88                                 | 88                                 | 73                            | 88                                 | 85                                  | 1.03                                |
| Consumption of sweets                | 84                              | 88                                 | 81                                 | 85                            | 85                                 | 80                                  | 1.09                                |
| Consumption of overripe fruits       | 83                              | 83                                 | 83                                 | 88                            | 80                                 | 80                                  | 1.06                                |
| Consumption of spoiled meal          | 54                              | 50                                 | 57                                 | 59                            | 49                                 | 54                                  | 0.93                                |
| Lack of hygiene                      | 51                              | 62                                 | 55                                 | 44                            | 41                                 | 51                                  | 1.20                                |
| Inborn disease                       | 20                              | 14                                 | 17                                 | 22                            | 19                                 | 27                                  | 0.52                                |
| <b>Place of treatment</b>            |                                 |                                    |                                    |                               |                                    |                                     |                                     |
| Dispensary/hospital                  | 69                              | 60                                 | 64                                 | 66                            | 78                                 | 76                                  | 0.78                                |
| Door-to-door sellers                 | 64                              | 50                                 | 67                                 | 68                            | 68                                 | 66                                  | 0.75                                |
| Family                               | 50                              | 40                                 | 64                                 | 44                            | 49                                 | 54                                  | 0.75                                |
| <b>Type of treatment</b>             |                                 |                                    |                                    |                               |                                    |                                     |                                     |
| Pharmaceutical medicine              | 84                              | 90                                 | 81                                 | 83                            | 80                                 | 85                                  | 1.05                                |
| Drugs sold on street markets         | 58                              | 48                                 | 67                                 | 59                            | 59                                 | 59                                  | 0.81                                |
| Traditional medicine                 | 49                              | 40                                 | 60                                 | 41                            | 51                                 | 54                                  | 0.75                                |
| <b>Prevention</b>                    |                                 |                                    |                                    |                               |                                    |                                     |                                     |
| Washing hands before eating          | 81                              | 88                                 | 90                                 | 77                            | 63                                 | 86                                  | 1.01                                |
| Avoiding overripe fruits consumption | 79                              | 76                                 | 90                                 | 90                            | 77                                 | 62                                  | 1.21                                |
| Washing hands after defecation       | 72                              | 79                                 | 83                                 | 61                            | 57                                 | 83                                  | 0.95                                |
| Avoiding meat consumption            | 71                              | 76                                 | 76                                 | 77                            | 63                                 | 62                                  | 1.21                                |
| Avoiding sweets consumption          | 70                              | 85                                 | 62                                 | 74                            | 63                                 | 62                                  | 1.36                                |
| Washing fruits before consumption    | 65                              | 67                                 | 83                                 | 61                            | 60                                 | 55                                  | 1.20                                |
| Wearing shoes                        | 55                              | 61                                 | 76                                 | 55                            | 37                                 | 45                                  | 1.35                                |
| Unknown                              | 20                              | 17                                 | 24                                 | 17                            | 17                                 | 24                                  | 0.68                                |

Data from the two study villages (Mélapleu and Zouatta II) in western Côte d'Ivoire were pooled.

<sup>a</sup>All values are percentages.

doi:10.1371/journal.pntd.0000910.t004

## Water contact behavior

Table 8 summarizes the principal reasons for water contact. We observed that pumps supplying potable water in each community were broken, and hence access to clean drinking water was difficult. The most frequent domestic activities placing individuals in contact with contaminated water were bathing in rivers, washing clothes, and crossing rivers. In each village, significant differences were found for washing dishes, bathing children, fetching drinking water, farming, fishing, swimming, and playing (all  $P < 0.05$ ).

Data from non-participant observation revealed that water contact patterns were similar in both villages. Rivers are frequently used for both occupational and recreational activities. Some women mentioned that they preferred to wash clothes in rivers because suitable washing stones were available and there was time for social interaction and community chores. We observed water contact behavior in both villages that could lead to contamination, such as women washing clothes, fishing, and children bathing in the river simultaneously. Moreover, we found evidence of open defecation along riverbanks.



**Table 5.** Knowledge of signs and symptoms, perceived causes, treatment, and prevention of intestinal schistosomiasis in 2003/2004.

| Variable                                 | Total <sup>a</sup> | Village                   |                         | $\chi^2$ | P-value             |
|------------------------------------------|--------------------|---------------------------|-------------------------|----------|---------------------|
|                                          |                    | Zouatta II <sup>a,b</sup> | Mélapleu <sup>a,c</sup> |          |                     |
| Knowledge (n = 207)                      | 43                 | 75                        | 14                      | 77.31    | <0.001              |
| Signs and symptoms <sup>d</sup> (n = 88) |                    |                           |                         |          |                     |
| Blood in stool                           | 93                 | 97                        | 75                      | 10.17    | <0.001              |
| Blood in urine                           | 86                 | 89                        | 75                      | 2.14     | 0.143               |
| Abdominal pain                           | 81                 | 85                        | 63                      | 4.14     | 0.042               |
| Vomiting                                 | 75                 | 75                        | 75                      | 0.00     | 1.000               |
| Diarrhea                                 | 73                 | 75                        | 63                      | 1.03     | 0.310               |
| Dysentery                                | 38                 | 39                        | 31                      | 0.32     | 0.568               |
| Perceived causes                         |                    |                           |                         |          |                     |
| Drinking contaminated water              | 86                 | 93                        | 56                      | 15.05    | <0.001              |
| Bathing in dirty water                   | 83                 | 88                        | 63                      | 5.78     | 0.016               |
| Open defecation in water                 | 71                 | 74                        | 56                      | 1.89     | 0.169               |
| Malnutrition                             | 57                 | 65                        | 19                      | N/A      | <0.001 <sup>e</sup> |
| Consumption of dirty fruits              | 51                 | 61                        | 6.3                     | N/A      | <0.001 <sup>e</sup> |
| Inborn disease                           | 13                 | 14                        | 0                       | N/A      | N/A                 |
| Place of treatment                       |                    |                           |                         |          |                     |
| Dispensary/hospital                      | 88                 | 86                        | 94                      | 0.69     | 0.403               |
| Family                                   | 35                 | 43                        | 0                       | N/A      | N/A                 |
| Traditional healer                       | 15                 | 18                        | 0                       | N/A      | N/A                 |
| Type of treatment                        |                    |                           |                         |          |                     |
| Pharmaceutical medicine                  | 85                 | 85                        | 88                      | 0.08     | 0.777               |
| Traditional medicine                     | 35                 | 42                        | 0                       | N/A      | N/A                 |
| Medicine sold on street markets          | 27                 | 29                        | 19                      | 0.71     | 0.397               |
| Prevention <sup>f</sup> (n = 80)         |                    |                           |                         |          |                     |
| Avoiding drinking dirty water            | 89                 | 93                        | 60                      | 9.64     | 0.002               |
| Avoiding bathing in dirty water          | 86                 | 86                        | 90                      | 0.12     | 0.724               |
| Avoiding open defecation in water        | 74                 | 72                        | 80                      | 0.29     | 0.587               |
| Avoiding unripe fruit consumption        | 69                 | 75                        | 20                      | N/A      | <0.001 <sup>e</sup> |

Data were compared between two villages (Mélapleu and Zouatta II) in western Côte d'Ivoire.

N/A, not applicable.

<sup>a</sup>All values are percentages.

<sup>b</sup>Village subjected to community-based research and control activities.

<sup>c</sup>Village subjected to school-based research and control activities.

<sup>d</sup>Only people who gave an affirmative response for knowledge of schistosomiasis were included in this analysis.

<sup>e</sup>P-value based on Fisher's exact test.

<sup>f</sup>Only people who gave an affirmative response for prevention were included in this analysis.

doi:10.1371/journal.pntd.0000910.t005

## Discussion

The aim of this study was to deepen our understanding and compare the local KAP of parasitic worm infections in two rural communities of western Côte d'Ivoire that were subjected either to school-based (Mélapleu) or community-based research and control activities (Zouatta II) against intestinal schistosomiasis and soil-transmitted helminthiasis. Both qualitative and quantitative methods were employed and data were triangulated. Since heads of households are a strong and recognized component of the cultural and social setting [43,44], special emphasis was placed on interviewing these individuals.

Demographic and socio-economic profiles in the two villages were similar with the exception of ethnicity, religion, and marital status. Interestingly, when household heads were asked about

health problems within the household and the community in general, intestinal worms and schistosomiasis were rarely mentioned spontaneously as a health problem of prime importance. This observation does not suggest that these infections are negligible, since worms were mentioned to be a serious health problem upon further probing. Most of the household interviewees possess more detailed knowledge of how a worm infection occurs and what measures are available for prevention than for schistosomiasis. The term 'bilharziose' was more readily understood in Zouatta II than in Mélapleu, although there was only little knowledge on the mode of transmission and how to prevent schistosomiasis, even in Zouatta II.

Our analysis of people's representations and practices against worms revealed that knowledge and practices lacked clear linear relationships. The following two considerations are offered for

**Table 6.** Perceived causes, treatment, and prevention of intestinal schistosomiasis among participants who previously heard about schistosomiasis in 2003/2004.

| Variable                          | Total<br>(n = 88) <sup>a</sup> | Educational attainment              |                                            |                                                            | $\chi^2$ | P-value            | Age group (years)              |                                |                              | $\chi^2$ | P-value            |
|-----------------------------------|--------------------------------|-------------------------------------|--------------------------------------------|------------------------------------------------------------|----------|--------------------|--------------------------------|--------------------------------|------------------------------|----------|--------------------|
|                                   |                                | Illiterate<br>(n = 38) <sup>a</sup> | Primary<br>school<br>(n = 28) <sup>a</sup> | Secondary<br>school and<br>higher<br>(n = 22) <sup>a</sup> |          |                    | 18–35<br>(n = 28) <sup>a</sup> | 36–60<br>(n = 42) <sup>a</sup> | >60<br>(n = 18) <sup>a</sup> |          |                    |
| Perceived causes                  |                                |                                     |                                            |                                                            |          |                    |                                |                                |                              |          |                    |
| Drinking dirty water              | 86                             | 89                                  | 89                                         | 77                                                         | 2.05     | 0.357              | 75                             | 90                             | 94                           | 4.67     | 0.097              |
| Bathing in dirty water            | 83                             | 82                                  | 79                                         | 91                                                         | 1.41     | 0.493              | 71                             | 93                             | 78                           | 5.88     | 0.053              |
| Open defecation in water          | 71                             | 71                                  | 71                                         | 68                                                         | 0.07     | 0.964              | 71                             | 71                             | 67                           | 0.15     | 0.925              |
| Malnutrition                      | 57                             | 63                                  | 50                                         | 55                                                         | 1.19     | 0.549              | 54                             | 67                             | 39                           | 4.13     | 0.126              |
| Consumption of dirty fruits       | 51                             | 55                                  | 46                                         | 50                                                         | 0.51     | 0.772              | 43                             | 55                             | 56                           | 1.12     | 0.568              |
| Inborn disease                    | 38                             | 19                                  | 7.1                                        | 4.5                                                        |          | 0.18 <sup>b</sup>  | 0                              | 12                             | 28                           | N/A      | 0.015 <sup>b</sup> |
| Place of treatment                |                                |                                     |                                            |                                                            |          |                    |                                |                                |                              |          |                    |
| Dispensary/hospital               | 88                             | 84                                  | 93                                         | 86                                                         | 1.13     | 0.566              | 96                             | 83                             | 83                           | 2.99     | 0.224              |
| Family                            | 35                             | 50                                  | 25                                         | 23                                                         | 6.42     | 0.04               | 18                             | 40                             | 50                           | 5.93     | 0.052              |
| Traditional healer                | 15                             | 24                                  | 7.1                                        | 7.1                                                        | 0.15     | 0.119              | 11                             | 9.5                            | 33                           | N/A      | 0.045 <sup>b</sup> |
| Type of treatment                 |                                |                                     |                                            |                                                            |          |                    |                                |                                |                              |          |                    |
| Pharmaceutical medicine           | 85                             | 84                                  | 96                                         | 72                                                         | 5.55     | 0.062              | 86                             | 81                             | 94                           | 1.82     | 0.401              |
| Traditional medicine              | 35                             | 55                                  | 25                                         | 14                                                         | N/A      | 0.002 <sup>b</sup> | 18                             | 40                             | 50                           | 5.93     | 0.052              |
| Medicine sold on street markets   | 27                             | 42                                  | 18                                         | 14                                                         | N/A      | 0.023 <sup>b</sup> | 25                             | 26                             | 33                           | 0.43     | 0.806              |
| Prevention                        |                                |                                     |                                            |                                                            |          |                    |                                |                                |                              |          |                    |
| Avoiding drinking dirty water     | 89                             | 97                                  | 92                                         | 71                                                         | 0.01     | 0.010              | 83                             | 90                             | 94                           | 1.46     | 0.481              |
| Avoiding bathing in dirt water    | 86                             | 86                                  | 80                                         | 95                                                         | 2.28     | 0.319              | 96                             | 83                             | 76                           | 3.14     | 0.208              |
| Avoiding open defecation in water | 68                             | 69                                  | 80                                         | 71                                                         | 0.99     | 0.609              | 74                             | 80                             | 53                           | 4.62     | 0.099              |
| Avoiding unripe fruit consumption | 69                             | 80                                  | 68                                         | 48                                                         | 6.31     | 0.043              | 50                             | 69                             | 67                           | 2.76     | 0.251              |

Data were pooled for the two study villages (Mélapele and Zouatta II) and stratified by educational attainment and age groups.

N/A, not applicable.

<sup>a</sup>All values are percentages.

<sup>b</sup>P-value based on Fisher's exact test.

doi:10.1371/journal.pntd.0000910.t006

discussion. First, schistosomiasis and soil-transmitted helminthiasis are deeply engrained in social-ecological systems [45], and hence the way of life and common behaviors are difficult to change. For example, open defecation was said to be more comfortable than in latrines. With regard to water supply, the water from unprotected open sources was reported to be of better taste compared to that from wells. Second, there was a lack of alternatives for the clean drinking water and improved sanitation. For example, the pumps which would have provided safe drinking water were not functional in the two villages at the time of the survey, and only one out of four households surveyed had latrines.

Previous studies carried out in other schistosome-endemic areas found a comparatively higher level of awareness of schistosomiasis than was observed in these two villages of western Côte d'Ivoire. For example, Ndamba (1998) reported that 80% of villagers in Zimbabwe were aware of schistosomiasis [46]. In a community in south-eastern Nigeria, 42% of respondents had a clear perception of the disease and 27% were aware of high prevalence rates [47]. Prior research conducted in Brazil [22] and Egypt [48] revealed that people were fairly familiar with schistosomiasis. It is conceivable that the better knowledge of intestinal schistosomiasis in Zouatta II than in Mélapele is attributable to the health information conveyed through a community-based approach.

Indeed, respondents from Zouatta II mentioned that research and control activities served as their main source of information. Moreover, some villagers noted that information on schistosomiasis was passed on to them through family members, thus indicating that community social organizations may act as an intermediary to deliver health education messages. A Senegalese study [49] demonstrated lower awareness of intestinal schistosomiasis among the population despite several years of health education, using a diversity of communicational outlets, including radio, television, and posters, among others. Lessons learned in Senegal point out that a research project can have a positive effect on raising local knowledge, and it was concluded that intensive community-based actions are an effective means to do so. As participants from Mélapele said that they learned about disease transmission at school, including and further strengthening the role of teachers in health education and community health promotion should be envisaged. Both the school and community structures should be integrated in such a health education program, so that school children can act as agents for the diffusion of health education messages. Indeed, studies from Brazil indicate that schools are a key source of information for schistosomiasis [22].

Passive case detection may be considered as a potential control measure if drugs are available at local and regional health facilities.

**Table 7.** Knowledge of signs and symptoms, perceived causes, treatment, and prevention of schistosomiasis, stratified by wealth quintiles, in 2003/2004.

| Variable                               | Total <sup>a</sup> | Wealth quintile        |                        |                   |                        |                         | Ratio<br>(most poor/<br>least poor) |
|----------------------------------------|--------------------|------------------------|------------------------|-------------------|------------------------|-------------------------|-------------------------------------|
|                                        |                    | Most poor <sup>a</sup> | Very poor <sup>a</sup> | Poor <sup>a</sup> | Less poor <sup>a</sup> | Least poor <sup>a</sup> |                                     |
| Knowledge of schistosomiasis (n = 207) | 43                 | 23                     | 20                     | 20                | 15                     | 22                      | 1.03                                |
| Signs and symptoms (n = 88)            |                    |                        |                        |                   |                        |                         |                                     |
| Blood in stool                         | 93                 | 100                    | 89                     | 94                | 92                     | 89                      | 1.11                                |
| Blood in urine                         | 86                 | 90                     | 83                     | 83                | 85                     | 89                      | 1.00                                |
| Abdominal pain                         | 81                 | 80                     | 83                     | 78                | 77                     | 84                      | 0.95                                |
| Vomiting                               | 75                 | 90                     | 78                     | 67                | 62                     | 74                      | 1.22                                |
| Diarrhea                               | 73                 | 70                     | 83                     | 72                | 69                     | 68                      | 1.02                                |
| Dysentery                              | 38                 | 55                     | 28                     | 28                | 38                     | 37                      | 1.49                                |
| Perceived causes                       |                    |                        |                        |                   |                        |                         |                                     |
| Drinking dirty water                   | 86                 | 90                     | 83                     | 89                | 92                     | 79                      | 1.14                                |
| Bathing in dirty water                 | 83                 | 90                     | 83                     | 83                | 77                     | 79                      | 1.14                                |
| Open defecation in water               | 71                 | 90                     | 67                     | 78                | 38                     | 68                      | 1.31                                |
| Malnutrition                           | 57                 | 63                     | 72                     | 61                | 38                     | 42                      | 1.49                                |
| Consumption of dirty fruits            | 51                 | 60                     | 56                     | 44                | 46                     | 47                      | 1.22                                |
| Place of treatment                     |                    |                        |                        |                   |                        |                         |                                     |
| Dispensary/hospital                    | 88                 | 90                     | 78                     | 83                | 92                     | 95                      | 0.95                                |
| Family                                 | 35                 | 40                     | 50                     | 39                | 13                     | 26                      | 1.34                                |
| Traditional healer                     | 15                 | 10                     | 22                     | 28                | 7.6                    | 5.2                     | 1.92                                |
| Type of treatment                      |                    |                        |                        |                   |                        |                         |                                     |
| Pharmaceutical medicine                | 85                 | 80                     | 78                     | 83                | 92                     | 95                      | 0.84                                |
| Traditional medicine                   | 35                 | 55                     | 44                     | 33                | 18                     | 21                      | 2.61                                |
| Drugs sold on street markets           | 27                 | 25                     | 22                     | 39                | 23                     | 26                      | 0.90                                |
| Prevention <sup>b</sup> (n = 80)       |                    |                        |                        |                   |                        |                         |                                     |
| Avoiding drinking dirty water          | 89                 | 85                     | 83                     | 83                | 85                     | 74                      | 1.15                                |
| Avoiding bathing in dirty water        | 80                 | 75                     | 83                     | 83                | 69                     | 84                      | 0.89                                |
| Avoiding open defecation in water      | 74                 | 75                     | 83                     | 67                | 46                     | 58                      | 1.29                                |
| Avoiding unripe fruit consumption      | 69                 | 65                     | 78                     | 50                | 77                     | 47                      | 1.37                                |
| Source of information                  |                    |                        |                        |                   |                        |                         |                                     |
| Hospital                               | 61                 | 70                     | 61                     | 44                | 85                     | 53                      | 1.33                                |
| Health worker <sup>c</sup>             | 59                 | 65                     | 61                     | 56                | 69                     | 42                      | 1.54                                |
| Radio                                  | 51                 | 55                     | 56                     | 33                | 62                     | 53                      | 1.04                                |
| Television                             | 48                 | 45                     | 50                     | 44                | 38                     | 58                      | 0.77                                |
| Family                                 | 35                 | 35                     | 28                     | 50                | 38                     | 26                      | 1.33                                |
| School                                 | 26                 | 30                     | 17                     | 22                | 31                     | 32                      | 0.95                                |
| Traditional healer                     | 11                 | 10                     | 0                      | 17                | 7.6                    | 16                      | 0.63                                |

Data from the two study villages (Mélapleu and Zouatta II) in western Côte d'Ivoire were pooled.

<sup>a</sup>All values are percentages.

<sup>b</sup>Only people who gave an affirmative response for prevention were included in this analysis.

<sup>c</sup>Schistosomiasis project staff.

doi:10.1371/journal.pntd.0000910.t007

An important mechanism to enhance health outcomes is to teach local community members (e.g., community health workers and teachers) about the signs and symptoms of worm infection, and implementing a community outreach treatment and prevention program. With this type of control strategy, however, community perceptions of diseases are particularly important in ensuring the control strategy's effectiveness, as perception will affect compliance [50]. In fact, recent evidence suggests that in the north-western

part of Uganda communities are increasingly resisting to regularly take anthelmintic drugs as part of preventive chemotherapy programs targeting multiple neglected tropical diseases simultaneously [51]. In our study, treatment by passive case detection should be considered as most of the respondents trusted pharmaceutical drugs. However, people used both modern and traditional medicine to treat worm infections; the majority of them considered modern medicine to be inaccessible, and used

**Table 8.** Reasons for water contact among respondents, stratified by study village, in 2003/2004.

| Reason for water contact | Total<br>(n = 207) <sup>a</sup> | Village                               |                                      | $\chi^2$ | P-value |
|--------------------------|---------------------------------|---------------------------------------|--------------------------------------|----------|---------|
|                          |                                 | Zouatta II <sup>a,b</sup><br>(n = 96) | Mélapleu <sup>a,c</sup><br>(n = 111) |          |         |
| Bathing                  | 92                              | 89                                    | 96                                   | 3.49     | 0.062   |
| Washing clothes          | 91                              | 93                                    | 90                                   | 0.44     | 0.505   |
| Crossing rivers          | 65                              | 72                                    | 59                                   | 3.49     | 0.061   |
| Washing dishes           | 65                              | 51                                    | 77                                   | 14.7     | <0.001  |
| Washing children         | 65                              | 44                                    | 82                                   | 34.5     | <0.001  |
| Fetching water           | 56                              | 43                                    | 67                                   | 12.0     | 0.001   |
| Fishing                  | 53                              | 62                                    | 45                                   | 6.29     | 0.012   |
| Swimming                 | 38                              | 51                                    | 27                                   | 12.6     | <0.001  |
| Farming                  | 21                              | 14                                    | 28                                   | 6.36     | 0.012   |
| Playing                  | 6.3                             | 10                                    | 3.0                                  | 5.20     | 0.023   |
| Religious practices      | 3.9                             | 3.0                                   | 5.0                                  | 0.26     | 0.608   |

<sup>a</sup>All values are percentages.

<sup>b</sup>Village subjected to community-based research and control activities.

<sup>c</sup>Village subjected to school-based research and control activities.

doi:10.1371/journal.pntd.0000910.t008

traditional medicine or drugs sold on local markets. This is consistent with findings from a study in Egypt, where it was found that traditional medications were frequently used, since modern treatments were either unavailable due to high costs or lack of supply [48].

With regard to the transmission of parasitic worms, a common belief in our study villages was that this primarily was through food. In particular, consumption of meat, sweets, and over-ripe fruits were perceived as key factors in disease transmission. The relationship between consumption of specific foodstuffs and intestinal helminth infections likely relates to the associated abdominal symptoms. For example, consumption of spoiled meat or over-ripe fruits is thought to cause symptoms of bloating and cramping, similar to helminthic infections. Curtale and colleagues [52] made similar observations in Egypt, where a close association between food and helminth infection was established. The perception relating food with helminthic disease affected the behavior of the current study populations regarding protective measures. In many instances, children with helminth infections were not allowed to consume either meat or fruit. From a public health perspective, this is an important issue as these food items are of high nutritional value. Hence, restricting certain foodstuffs as they are perceived to be associated with helminthic infection may lead to, or further exacerbate, delayed child development [21,53,54]. Furthermore, our quantitative results revealed that soil was an unknown source of transmission for intestinal worm infections. This was confirmed during FGDs; only one woman in a FGD mentioned that infection could be transmitted when children eat soil. With regard to intestinal schistosomiasis, we did not identify any particular beliefs within the communities. This finding is in contrast to urinary schistosomiasis; common beliefs such as hematuria have been reported as a sign of puberty for male individuals [55].

Nonetheless, the observed low awareness of intestinal schistosomiasis in an area of high endemicity is intriguing, and clearly demonstrates the difficulty in comparing the biomedical and popular conception of disease. In fact, intestinal schistosomiasis is frequently confused with other diseases that have the same or

similar symptoms. In general, there seems to be a lack of consistency between the transmission and preventive measures taken against schistosomiasis and other parasitic worm infections. Commonly, people's knowledge is a combination of endogenous and exogenous wisdom. Indeed, respondents gave answers in both categories; there was knowledge with a clear biomedical root obtained from health workers and the research team on one hand, and information obtained from the cultural milieu on the other hand. For example, people mentioned that wearing shoes is a preventive measure against worms, without mentioning that soil contact is necessary for worm transmission. The knowledge of shoes preventing soil-transmitted helminth infections was obtained or reinforced by the research team during the meetings preceding the 2004 survey. It follows that knowledge of the modes of transmission and prevention of worm infections was moderate at best. Improving the public's perception of schistosomiasis would require sustained control efforts and intensive educational actions. Yet, enhanced knowledge and practices do not necessarily lead to behavioral changes. For example, even if the public's awareness about infection risks improves, people will continue to visit contaminated water sources if there are no readily available alternatives, the fetching of water at open water sources continues to be related to important social interaction, and the taste of current water sources is perceived as better than the water obtained from wells [56–58]. Hopefully following a community-based health education campaign, knowledge of common symptoms and transmission may lead to improved health-seeking behavior and early treatment [59,60].

We found two health-science behaviors, namely hand washing before eating and hand washing after defecation. While these behaviors are laudable, they are unfortunately overshadowed by other practices of poor hygiene. For example, only 25% of households had a latrine and despite this, villagers tend to defecate where convenient – still rarely using latrines where available. Such practices are dangerous as the number of helminth eggs produced by one adult female worm is so large that a single contaminated stool passed in the soil is sufficient to infect an entire village [61]. It would be interesting to try a community-led total sanitation

approach (CLTS) and measure the impact of such a strategy on re-infection patterns of soil-transmitted helminthiasis, intestinal schistosomiasis and other neglected tropical diseases [17]. CLTS is an integrated approach to achieve and sustain an open defecation-free status of communities through a participatory approach. It facilitates the critical analysis by the community of their own sanitation profile, their practices of defecation and the consequences, leading to collective action to become open defecation-free, and hence is accompanied by environmental measures to improve sanitation, hygiene practices, waste disposal, and protection of clean drinking water sources [62].

In conclusion, our results emphasize that current morbidity control through preventive chemotherapy primarily targeting school-aged children has limitations. Older population segments are insufficiently addressed, and hence new knowledge on prevention and control of parasitic worm infections is minimal. Improved access to clean water and sanitation is necessary for sustainable control of major helminthiasis, and participatory approaches such as CLTS should be attempted. Our results further suggest that educational programs should target areas of high endemicity with community-based interventions. We recommend that household heads from all socio-economic segments should be specifically targeted, so that they can transmit important health information to their children and relatives. For such a program to be effective, a continuous surveillance process directed at monitoring passive case detection, assessing the impact of health education messages, and evaluating change in infection patterns are necessary.

## References

- Stoll NR (1947) This wormy world. *J Parasitol* 33: 1–18.
- WHO (2002) Prevention and control of schistosomiasis and soil-transmitted helminthiasis: report of a WHO expert committee. WHO Tech Rep Ser 912: 1–57.
- Utzing J, Keiser J (2004) Schistosomiasis and soil-transmitted helminthiasis: common drugs for treatment and control. *Expert Opin Pharmacother* 5: 263–285.
- Bethony J, Brooker S, Albonico M, Geiger SM, Loukas A, et al. (2006) Soil-transmitted helminth infections: ascariasis, trichuriasis, and hookworm. *Lancet* 367: 1521–1532.
- Steinmann P, Keiser J, Bos R, Tanner M, Utzing J (2006) Schistosomiasis and water resources development: systematic review, meta-analysis, and estimates of people at risk. *Lancet Infect Dis* 6: 411–425.
- Hotez PJ, Brindley PJ, Bethony JM, King CH, Pearce EJ, et al. (2008) Helminth infections: the great neglected tropical diseases. *J Clin Invest* 118: 1311–1321.
- Keiser J, Utzing J (2010) The drugs we have and the drugs we need against major helminth infections. *Adv Parasitol* 73: 197–230.
- de Silva NR, Brooker S, Hotez PJ, Montresor A, Engels D, et al. (2003) Soil-transmitted helminth infections: updating the global picture. *Trends Parasitol* 19: 547–551.
- Hotez P (2008) Hookworm and poverty. *Ann N Y Acad Sci* 1136: 38–44.
- Hotez PJ, Ehrenberg JP (2010) Escalating the global fight against neglected tropical diseases through interventions in the Asia Pacific region. *Adv Parasitol* 72: 31–53.
- Raso G, Luginbühl A, Adjoua CA, Tian-Bi NT, Silué KD, et al. (2004) Multiple parasite infections and their relationship to self-reported morbidity indicators in a community of rural Côte d'Ivoire. *Int J Epidemiol* 33: 1092–1102.
- Brooker S, Akhware W, Pullan R, Estamale B, Clarke SE, et al. (2007) Epidemiology of *Plasmodium*-helminth co-infection in Africa: population at risk, potential impact on anemia, and prospects for combining control. *Am J Trop Med Hyg* 77(Suppl 6): 88–98.
- Steinmann P, Du ZW, Wang LB, Wang XZ, Jiang JY, et al. (2008) Extensive multiparasitism in a village of Yunnan province, People's Republic of China, revealed by a suite of diagnostic methods. *Am J Trop Med Hyg* 78: 760–769.
- Colley DG, LoVerde PT, Savioli L (2001) Medical helminthology in the 21st century. *Science* 293: 1437–1438.
- Fenwick A, Webster JP, Bosque-Oliva E, Blair L, Fleming FM, et al. (2009) The Schistosomiasis Control Initiative (SCI): rationale, development and implementation from 2002–2008. *Parasitology* 136: 1719–1730.
- Savioli L, Gabrielli AF, Montresor A, Chitsulo L, Engels D (2009) Schistosomiasis control in Africa: 8 years after World Health Assembly Resolution 54.19. *Parasitology* 136: 1677–1681.
- Utzing J, Raso G, Brooker S, de Savigny D, Tanner M, et al. (2009) Schistosomiasis and neglected tropical diseases: towards integrated and sustainable control and a word of caution. *Parasitology* 136: 1859–1874.
- Asaolu SO, Ofozie IE (2003) The role of health education and sanitation in the control of helminth infections. *Acta Trop* 86: 283–294.
- Utzing J, Bergquist R, Xiao SH, Singer BH, Tanner M (2003) Sustainable schistosomiasis control – the way forward. *Lancet* 362: 1932–1934.
- Singer BH, de Castro MC (2007) Bridges to sustainable tropical health. *Proc Natl Acad Sci USA* 104: 16038–16043.
- WHO (1995) WHO model prescribing information: drugs used in parasitic diseases (2<sup>nd</sup> ed.). Geneva: World Health Organization.
- Uchoa E, Barreto SM, Firmo JO, Guerra HL, Pimenta FG, Jr., et al. (2000) The control of schistosomiasis in Brazil: an ethnoepidemiological study of the effectiveness of a community mobilization program for health education. *Soc Sci Med* 51: 1529–1541.
- Mwanga JR, Magnussen P, Mugashe CL, Gabone RM, Aagaard-Hansen J (2004) Schistosomiasis-related perceptions, attitudes and treatment-seeking practices in Magu district, Tanzania: public health implications. *J Biosoc Sci* 36: 63–81.
- Aagaard-Hansen J, Mwanga JR, Bruun B (2009) Social science perspectives on schistosomiasis control in Africa: past trends and future directions. *Parasitology* 136: 1747–1758.
- Utzing J, N'Goran EK, Esse Aya CM, Acka Adjoua C, Lohourignon KL, et al. (1998) *Schistosoma mansoni*, intestinal parasites and perceived morbidity indicators in schoolchildren in a rural endemic area of western Côte d'Ivoire. *Trop Med Int Health* 3: 711–720.
- Utzing J, N'Goran EK, Ossey YA, Booth M, Traoré M, et al. (2000) Rapid screening for *Schistosoma mansoni* in western Côte d'Ivoire using a simple school questionnaire. *Bull World Health Organ* 78: 389–398.
- Utzing J, N'Goran EK, N'Dri A, Lengeler C, Xiao SH, et al. (2000) Oral artemether for prevention of *Schistosoma mansoni* infection: randomised controlled trial. *Lancet* 355: 1320–1325.
- Raso G, Utzing J, Silué KD, Ouattara M, Yapi A, et al. (2005) Disparities in parasitic infections, perceived ill health and access to health care among poorer and less poor schoolchildren of rural Côte d'Ivoire. *Trop Med Int Health* 10: 42–57.
- Raso G, Matthys B, N'Goran EK, Tanner M, Vounatsou P, et al. (2005) Spatial risk prediction and mapping of *Schistosoma mansoni* infections among schoolchildren living in western Côte d'Ivoire. *Parasitology* 131: 97–108.
- Fürst T, Raso G, Acka CA, Tschannen AB, N'Goran EK, et al. (2009) Dynamics of socioeconomic risk factors for neglected tropical diseases and malaria in an armed conflict. *PLoS Negl Trop Dis* 3: e513.
- Scherrer AU, Sjöberg MK, Allangba A, Traore M, Lohourignon LK, et al. (2009) Sequential analysis of helminth egg output in human stool samples

## Supporting Information

**Alternative Language Abstract S1** Translation of the abstract into French by Cinthia Acka

Found at: doi:10.1371/journal.pntd.0000910.s001 (.27 MB DOC)

**Alternative Language Abstract S2** Translation of the abstract into German by Jürg Utzinger and Jennifer Keiser

Found at: doi:10.1371/journal.pntd.0000910.s002 (.28 MB DOC)

**Alternative Language Abstract S3** Translation of the abstract into Italian by Giovanna Raso and Aurelio Di Pasquale

Found at: doi:10.1371/journal.pntd.0000910.s003 (.27 MB DOC)

## Acknowledgments

We thank the national and district health and education authorities of Man for facilitating our work in this conflict afflicted region. We are also grateful to the chiefs and authorities of Mélapleu and Zouatta II in western Côte d'Ivoire, the health committee, the household heads, the participants in the FGDs and key informants for their willingness to collaborate, and Dr. Denis Goh, a sociologist, for his support during the FGDs.

## Author Contributions

Conceived and designed the experiments: CAA GR EKN ABT BO JU. Performed the experiments: CAA. Analyzed the data: CAA GR ABT IIB JU. Contributed reagents/materials/analysis tools: CAA GR EKN ES MT BO JU. Wrote the paper: CAA GR IIB JU.

- following albendazole and praziquantel administration. *Acta Trop* 109: 226–231.
32. Tchuem Tchuenté LA, N'Goran EK (2009) Schistosomiasis and soil-transmitted helminthiasis control in Cameroon and Côte d'Ivoire: implementing control on a limited budget. *Parasitology* 136: 1739–1745.
  33. Luginbühl AK (2005) Social perception of water associated infection risks – concept of an awareness campaign using visual media. Bern: University of Bern. 331 p.
  34. Utzinger J, Booth M, N'Goran EK, Müller I, Tanner M, et al. (2001) Relative contribution of day-to-day and intra-specimen variation in faecal egg counts of *Schistosoma mansoni* before and after treatment with praziquantel. *Parasitology* 122: 537–544.
  35. Raso G, Vounatsou P, Gosoniú L, Tanner M, N'Goran EK, et al. (2006) Risk factors and spatial patterns of hookworm infection among schoolchildren in a rural area of western Côte d'Ivoire. *Int J Parasitol* 36: 201–210.
  36. Raso G, Vounatsou P, McManus DP, Utzinger J (2007) Bayesian risk maps for *Schistosoma mansoni* and hookworm mono-infections in a setting where both parasites co-exist. *Geospat Health* 2: 85–96.
  37. Beck-Wörner C, Raso G, Vounatsou P, N'Goran EK, Rigo G, et al. (2007) Bayesian spatial risk prediction of *Schistosoma mansoni* infection in western Côte d'Ivoire using a remotely-sensed digital elevation model. *Am J Trop Med Hyg* 76: 956–963.
  38. Raso G, N'Goran EK, Toty A, Luginbühl A, Adjoua CA, et al. (2004) Efficacy and side effects of praziquantel against *Schistosoma mansoni* in a community of western Côte d'Ivoire. *Trans R Soc Trop Med Hyg* 98: 18–27.
  39. Gryseels B (1992) Morbidity due to infection with *Schistosoma mansoni*: an update. *Trop Geogr Med* 44: 189–200.
  40. Filmer D, Pritchett LH (2001) Estimating wealth effects without expenditure data – or tears: an application to educational enrollments in states of India. *Demography* 38: 115–132.
  41. Armstrong Schellenberg J, Victora CG, Mushi A, de Savigny D, Schellenberg D, et al. (2003) Inequities among the very poor: health care for children in rural southern Tanzania. *Lancet* 361: 561–566.
  42. Massé R (1995) Culture et santé publique. Montréal Gaëtan Morin Editeur. 499 p.
  43. Kamunvi F, Ferguson AG (1993) Knowledge, attitudes and practices (KAP) of human intestinal helminths (worms) in two rural communities in Nyanza province, Western Kenya. *East Afr Med J* 70: 482–490.
  44. Bethony J, Williams JT, Kloos H, Blangero J, Alves-Fraga L, et al. (2001) Exposure to *Schistosoma mansoni* infection in a rural area in Brazil. II: Household risk factors. *Trop Med Int Health* 6: 136–145.
  45. Utzinger J, N'Goran E K, Caffrey CR, Keiser J (2010) From innovation to application: social-ecological context, diagnostics, drugs and integrated control of schistosomiasis. *Acta Trop* (in press; doi:10.1016/j.actatropica.2010.1008.1020).
  46. Ndamba J, Makura O, Gwatirisa PR, Makaza N, Kaondera KC (1998) A cost effective two step rapid diagnosis of urinary schistosomiasis in Zimbabwe. *Cent Afr J Med* 44: 167–171.
  47. Ukwandu NC, Nmorsi OP (2004) The perception, beliefs and practices toward genitourinary schistosomiasis by inhabitants of selected endemic areas (Edo/Delta States) in south-eastern Nigeria. *Rev Inst Med Trop São Paulo* 46: 209–216.
  48. Kloos H, Sidrak W, Michael AA, Mohareb EW, Higashi GI (1982) Disease concepts and treatment practices relating to schistosomiasis haematobium in Upper Egypt. *J Trop Med Hyg* 85: 99–107.
  49. Sow S, de Vlas SJ, Mbaye A, Polman K, Gryseels B (2003) Low awareness of intestinal schistosomiasis in northern Senegal after 7 years of health education as part of intense control and research activities. *Trop Med Int Health* 8: 744–749.
  50. Guyatt H, Brooker S, Lwambo NJ, Siza JE, Bundy DA (1999) The performance of school-based questionnaires of reported blood in urine in diagnosing *Schistosoma haematobium* infection: patterns by age and sex. *Trop Med Int Health* 4: 751–757.
  51. Parker M, Allen T, Hastings J (2008) Resisting control of neglected tropical diseases: dilemmas in the mass treatment of schistosomiasis and soil-transmitted helminths in north-west Uganda. *J Biosoc Sci* 40: 161–181.
  52. Curtale F, Pezzotti P, Sharbini AL, al Maadat H, Ingrosso P, et al. (1998) Knowledge, perceptions and behaviour of mothers toward intestinal helminths in Upper Egypt: implications for control. *Health Policy Plan* 13: 423–432.
  53. Awasthi S, Bundy DAP, Savioli L (2003) Helminthic infections. *BMJ* 327: 431–433.
  54. Ulukanligil M, Seyrek A (2004) Demographic and socio-economic factors affecting the physical development, haemoglobin and parasitic infection status of schoolchildren in Sanliurfa province, Turkey. *Public Health* 118: 151–158.
  55. Takougang I, Meli J, Fotso S, Angwafo F, 3rd, Kamajeu R, et al. (2004) Some social determinants of urinary schistosomiasis in Northern Cameroon: implications for schistosomiasis control. *Afr J Health Sci* 11: 111–120.
  56. Kloos H (1995) Human behavior, health education and schistosomiasis control: a review. *Soc Sci Med* 40: 1497–1511.
  57. Yuan HC, Guo JG, Bergquist R, Tanner M, Chen XY, et al. (2000) The 1992–1999 World Bank schistosomiasis research initiative in China: outcome and perspectives. *Parasitol Int* 49: 195–207.
  58. Yuan LP, Manderson L, Ren MY, Li GP, Yu DB, et al. (2005) School-based interventions to enhance knowledge and improve case management of schistosomiasis: a case study from Hunan, China. *Acta Trop* 96: 248–254.
  59. Butterworth AE, Sturrock RF, Ouma JH, Mbugua GG, Fulford AJ, et al. (1991) Comparison of different chemotherapy strategies against *Schistosoma mansoni* in Machakos district, Kenya: effects on human infection and morbidity. *Parasitology* 103: 339–355.
  60. Mehanna S, Winch PJ, Rizkalla NH, el-Sayed HF, Abaza SM (1997) Factors affecting knowledge of the symptoms of schistosomiasis in two rural areas near Ismailia, Egypt. *Trop Med Int Health* 2: A36–47.
  61. Stephenson LS, Latham MC, Adams EJ, Kinoti SN, Pertet A (1993) Physical fitness, growth and appetite of Kenyan school boys with hookworm, *Trichuris trichiura* and *Ascaris lumbricoides* infections are improved four months after a single dose of albendazole. *J Nutr* 123: 1036–1046.
  62. Kar K, Chambers R (2008) Handbook on community-led total sanitation. London: Plan UK. 96 p.
